# Supplementary figures and images for: Expression characteristics of interferon-stimulated genes and possible regulatory mechanisms in lupus patients using transcriptomics analyses
Source: PubMed Central journal article supplement — eBioMedicine. 2021 Jul 17;70:103477. doi: 10.1016/j.ebiom.2021.103477 (PMC8318865; doi:10.1016/j.ebiom.2021.103477), 2021-07-17

**A**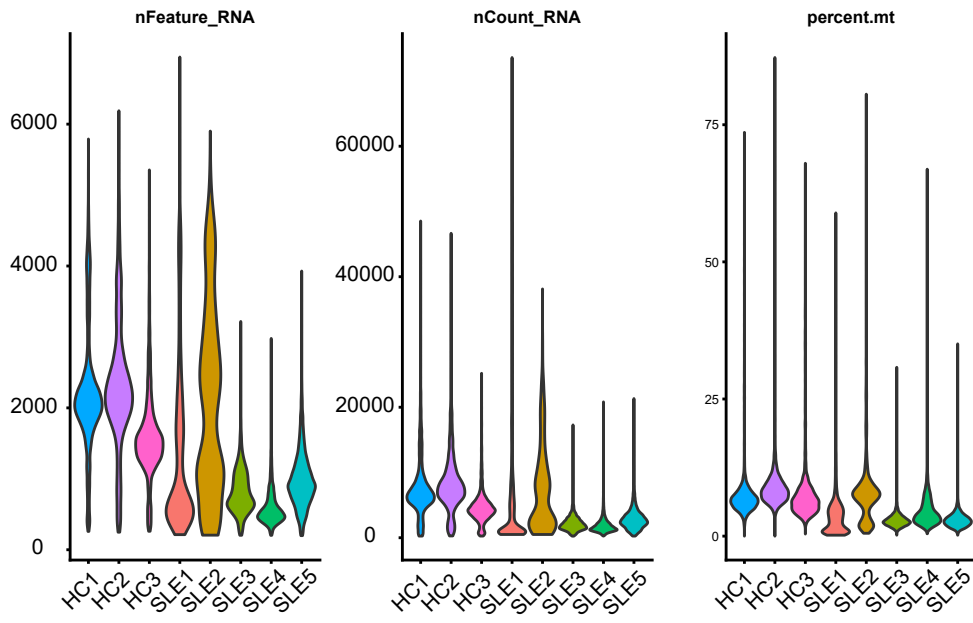**B**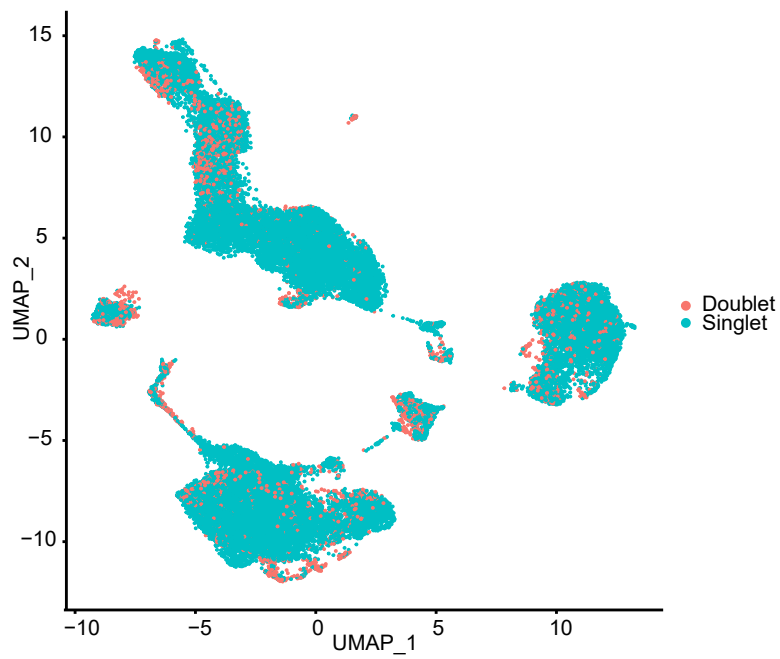**C**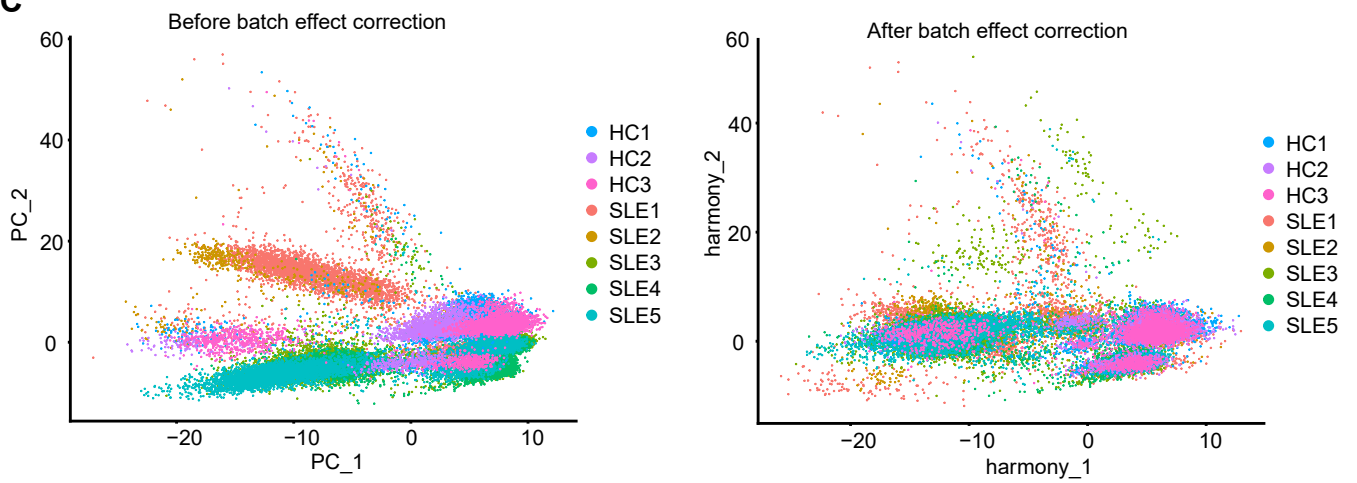

Supplement: mmc1.pdf [file mmc1.pdf]

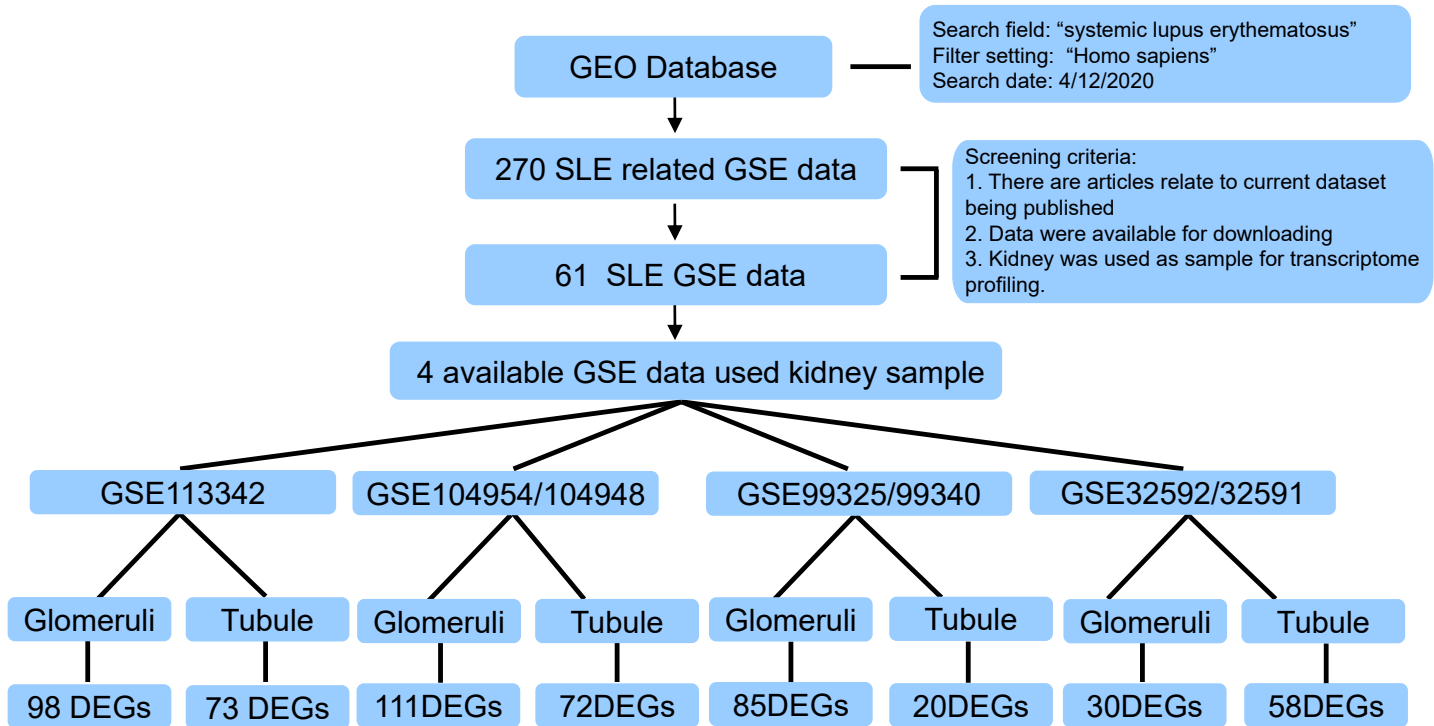

Supplement: mmc2.pdf [file mmc2.pdf]

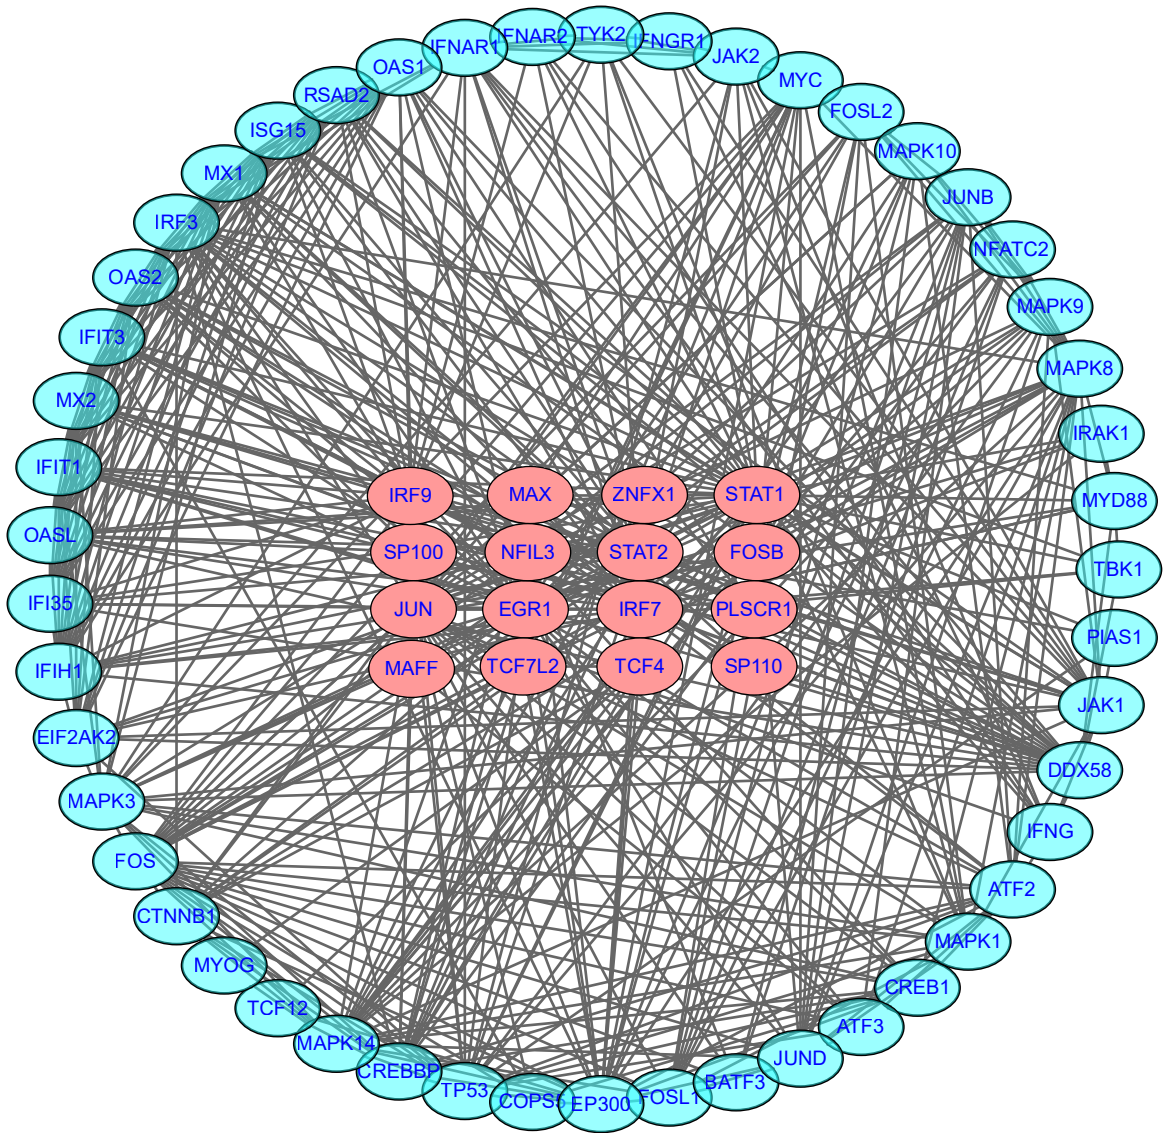

Supplement: mmc3.pdf [file mmc3.pdf]

## Westernblot

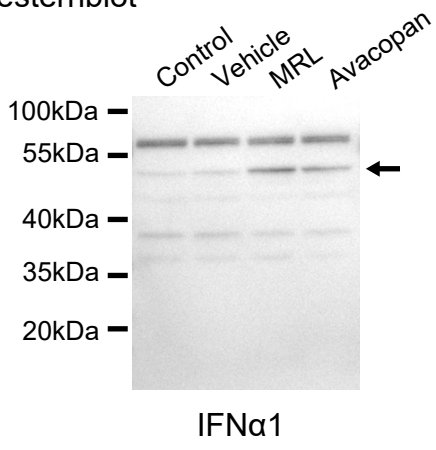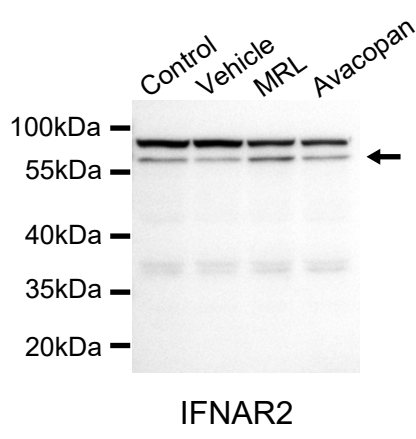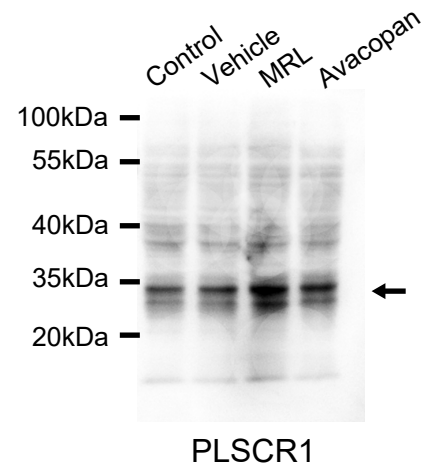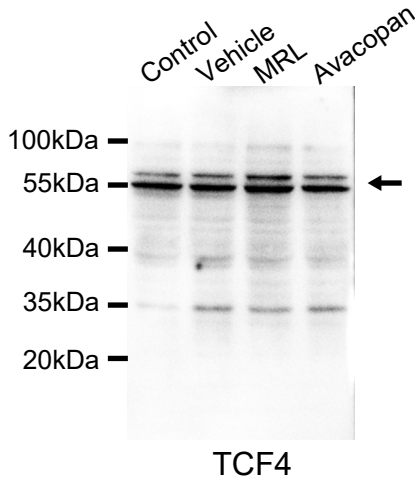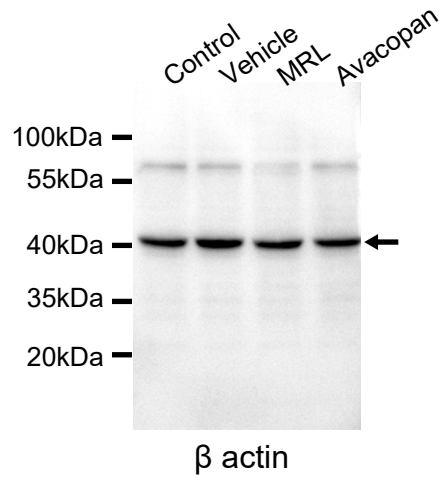

## Co-immunoprecipitation

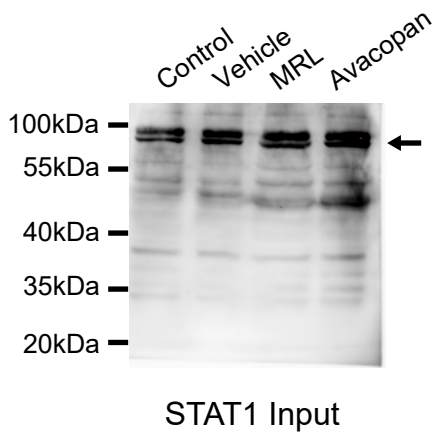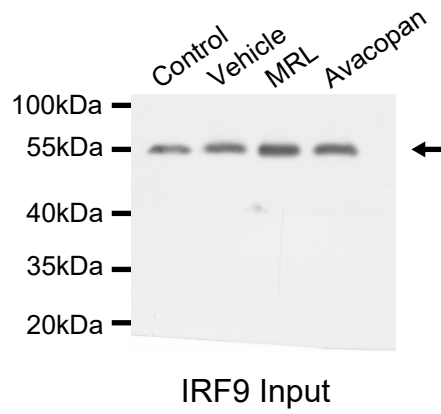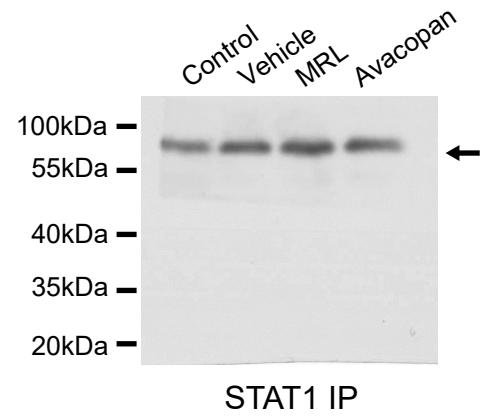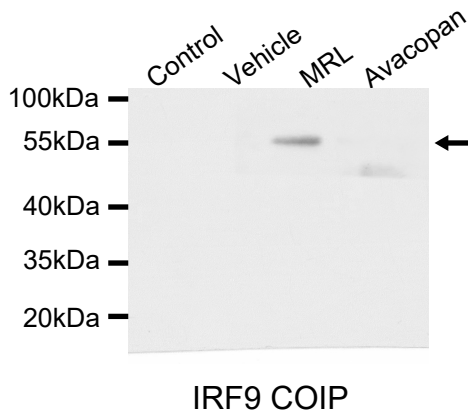

Supplement: mmc8.pdf [file mmc8.pdf]
